# Supplementary material
Source: PubMed Central journal article supplement (PMC8617464)
Supplement: pnas.2102750118.sapp.pdf [file pnas.2102750118.sapp.pdf]

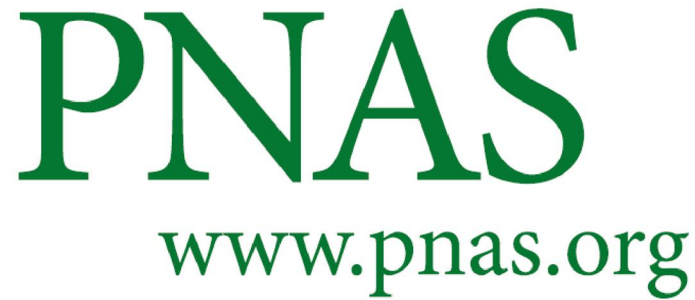

## **Supplementary Information for**

### **Heme auxotrophy in abundant aquatic microbial lineages**

Suhyun Kim<sup>1</sup>, Innam Kang<sup>2\*</sup>, Jin-Won Lee<sup>3</sup>, Che Ok Jeon<sup>4</sup>, Stephen J. Giovannoni<sup>5</sup>, and Jang-Cheon Cho<sup>1,6\*</sup>

Corresponding authors:

\*Innam Kang: Center for Molecular and Cell Biology, Inha University, Inharo 100, Incheon 22212, Republic of Korea. Tel: +82-32-876-5541, [ikang@inha.ac.kr](mailto:ikang@inha.ac.kr)

\*Jang-Cheon Cho: Department of Biological Sciences, Inha University, Inharo 100, Incheon 22212, Republic of Korea. Tel: +82-32-860-7711, [chojc@inha.ac.kr](mailto:chojc@inha.ac.kr)

#### **This PDF file includes:**

Figures S1 to S14  
Tables S1 to S5  
Legends for Dataset S1  
SI References

#### **Other supplementary materials for this manuscript include the following:**

Dataset S1

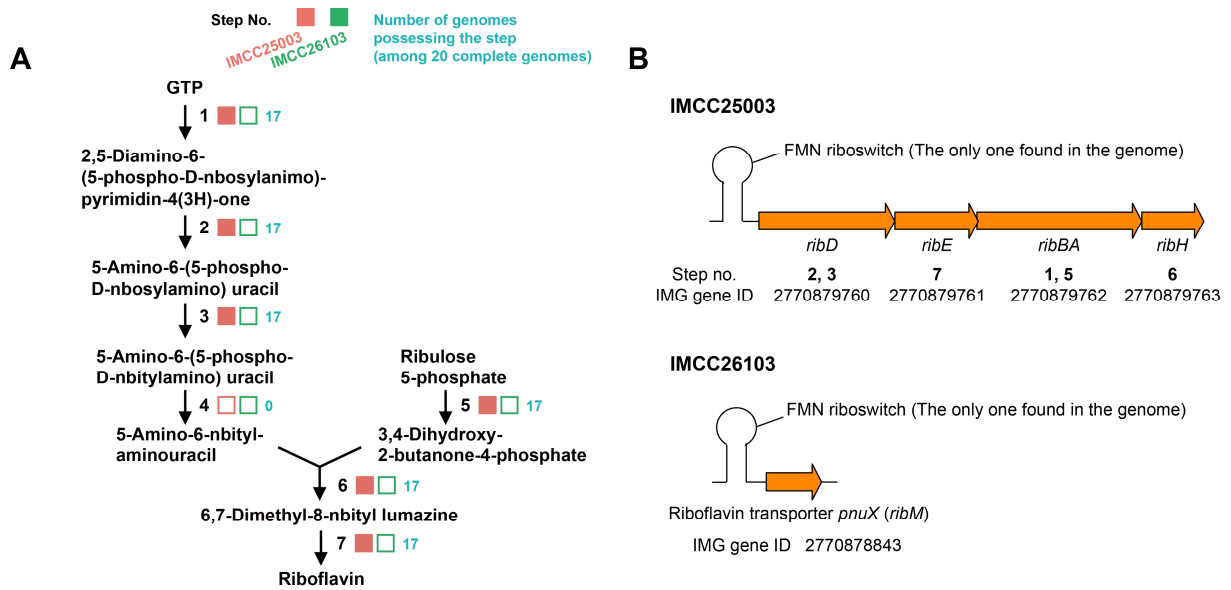

**Fig. S1.** Riboflavin biosynthetic pathway in the acI genomes. (A) The presence (filled) and absence (empty) of each step in the two acI genomes are indicated with colored boxes (orange, IMCC25003; green, IMCC26103). The numbers of the acI genomes (among 20) possessing each step were written in blue. Note that the putative enzymes mediating step four, the only missing step in IMCC25003, have only recently been identified<sup>1,2</sup>, and therefore many genomes of riboflavin-prototrophic microorganisms are still predicted to lack this step according to KEGG-based annotation. (B) The genes for riboflavin biosynthesis (IMCC25003) and transport (IMCC26103) are located just downstream of the only FMN riboswitch predicted in each genome.

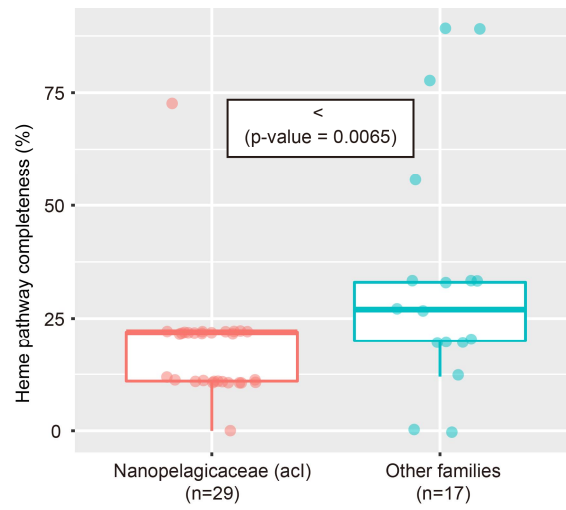

**Fig. S2.** Distribution of the completeness of heme biosynthesis pathway among the acl lineage (*Nanopelagicaceae*) and other families in the order *Nanopelagicales*. Inset shows the result of one-sided Mann-Whitney *U* test.

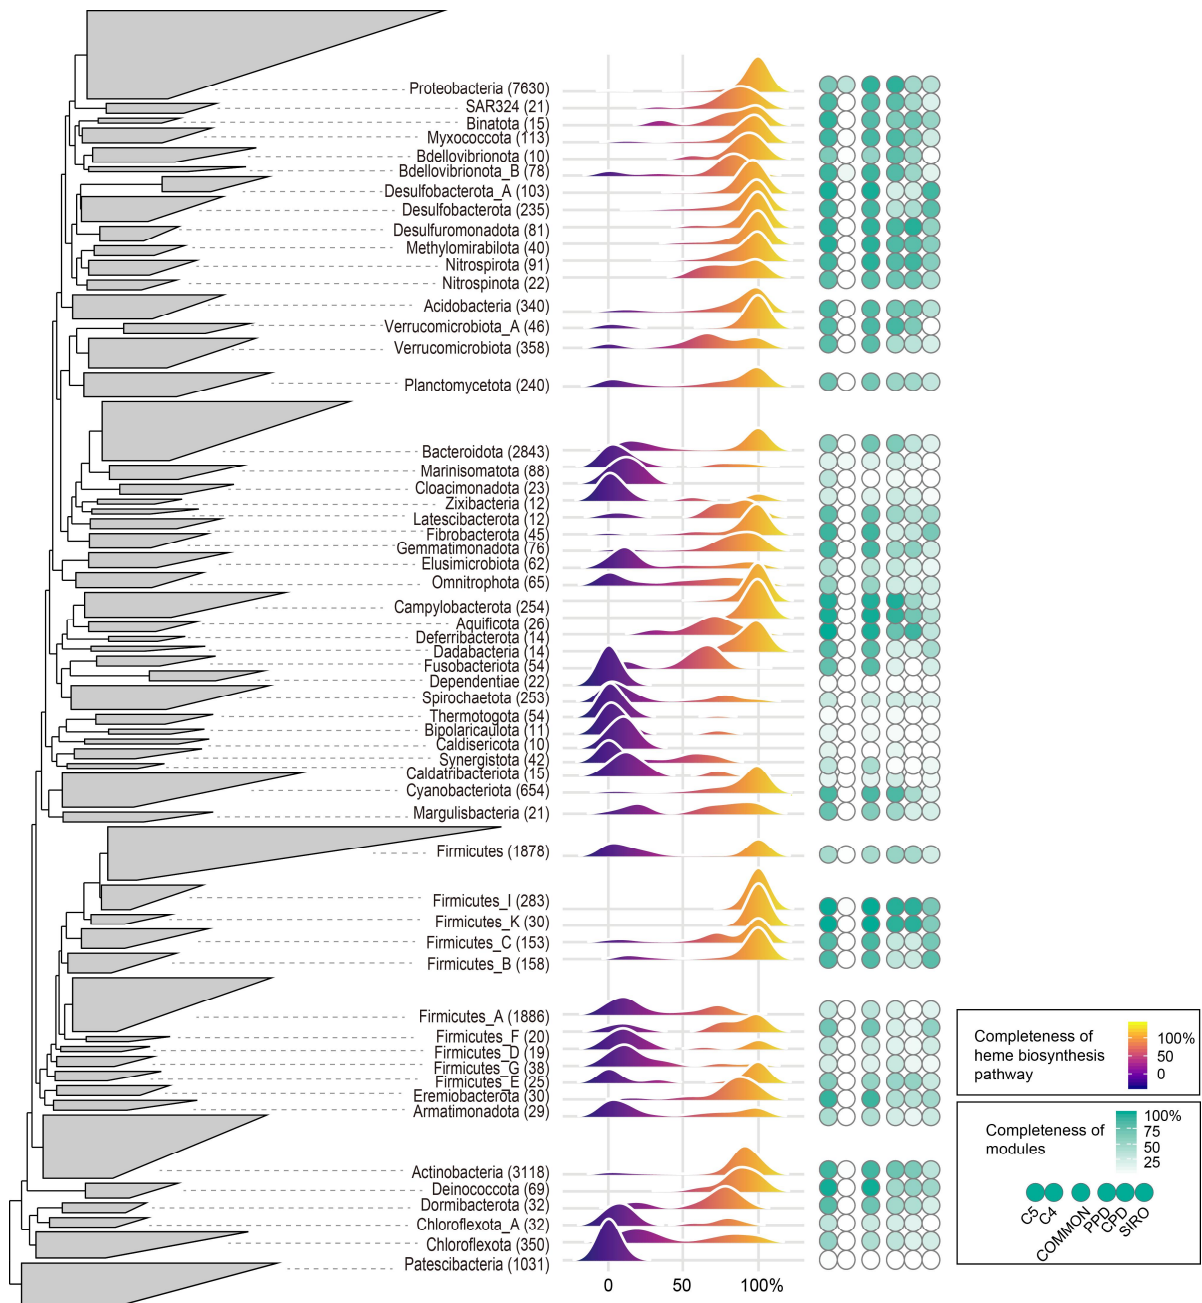

**Fig. S3.** Distribution of the heme biosynthetic pathway completeness in diverse bacterial phyla. **left,** An approximate maximum-likelihood tree of representative genomes for bacterial species clusters constructed by FastTree2 using a concatenated alignment of 120 conserved marker proteins. The genomes were grouped by phyla, and the phylum *Patescibacteria* was set as an outgroup. Phyla with less than 10 genomes were excluded from tree building. **middle,** Ridgeline density plots showing the distribution of the heme biosynthetic pathway completeness in bacterial phyla. The colors under the ridgelines indicate the pathway completeness according to the color gradient on the right. **right,** Average completeness of six pathway modules of bacterial phyla. The color intensity indicates the completeness according to the color gradient on the right. Refer to Fig. 1 for more details on the pathway modules.



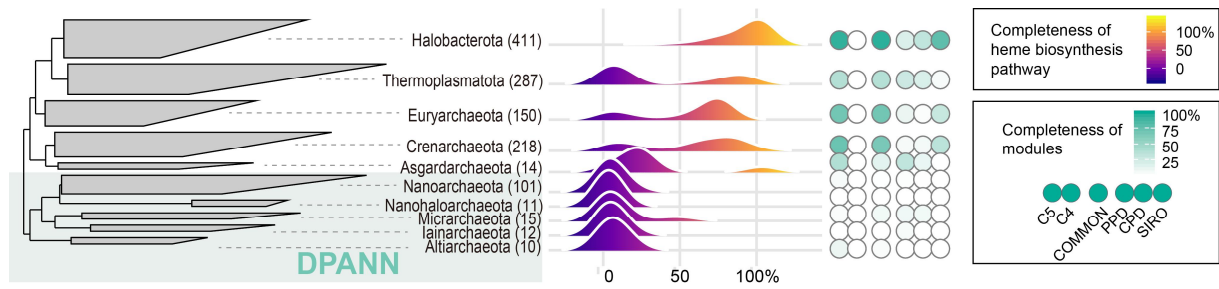

**Fig. S4.** Distribution of the heme biosynthetic pathway completeness in diverse archaeal phyla. **left,** An approximate maximum-likelihood tree of representative genomes for archaeal species clusters constructed by FastTree2 using a concatenated alignment of 122 conserved marker proteins. The genomes were grouped by phyla, and the superphylum DPANN (from *Nanoarchaeota* to *Altiarchaeota*) was set as an outgroup. Phyla with less than 10 genomes were excluded from tree building. **middle,** Ridgeline density plots showing the distribution of the heme biosynthetic pathway completeness in archaeal phyla. The colors under the ridgelines indicate pathway completeness according to the color gradient on the right. **right,** Average completeness of six pathway modules of archaeal phyla. The color intensity indicates the pathway completeness according to the color gradient on the right. Refer to Fig. 1 for more details on the pathway modules.

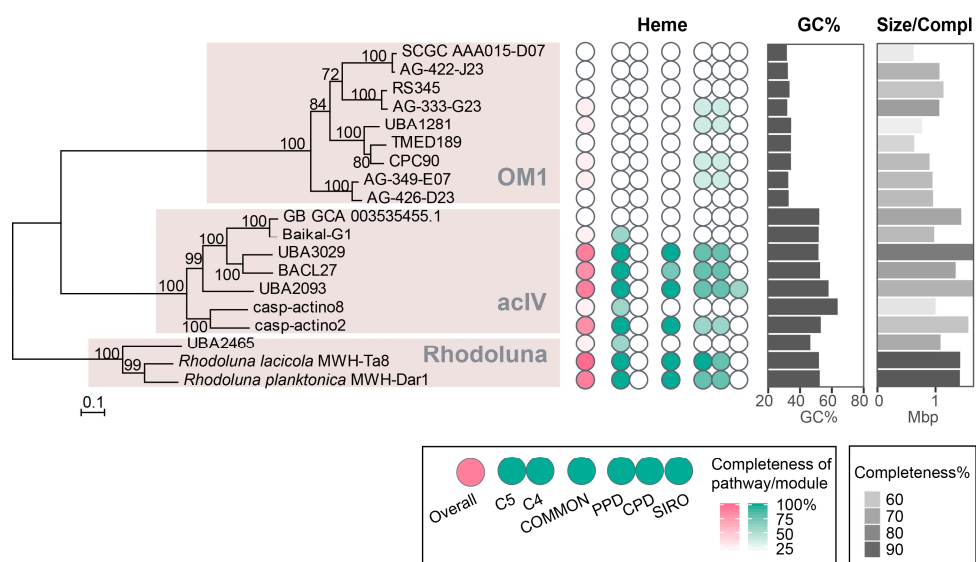

**Fig. S5.** Heme biosynthetic pathway completeness of representative genomes for species clusters belonging to OM1 (*Candidatus Actinomarinales*; o\_\_TMED189 in GTDB), acIV, and the genus *Rhodoluna* of *Actinobacteriota*. **left**, Maximum-likelihood tree constructed by RAxML using a concatenated alignment of conserved marker proteins. The genus *Rhodoluna* was set as an outgroup. **middle**, Overall heme biosynthetic pathway completeness (indicated in pink) and the completeness of six pathway modules (indicated in green) within the genomes. The color intensity indicates the pathway completeness according to the color scales in the bottom legend. **right**, The GC contents and genome sizes are illustrated with bar graphs. Genome completeness is indicated as the darkness of the genome size bars according to the gray scale at the bottom. The data were downloaded from the GTDB (Release 89).

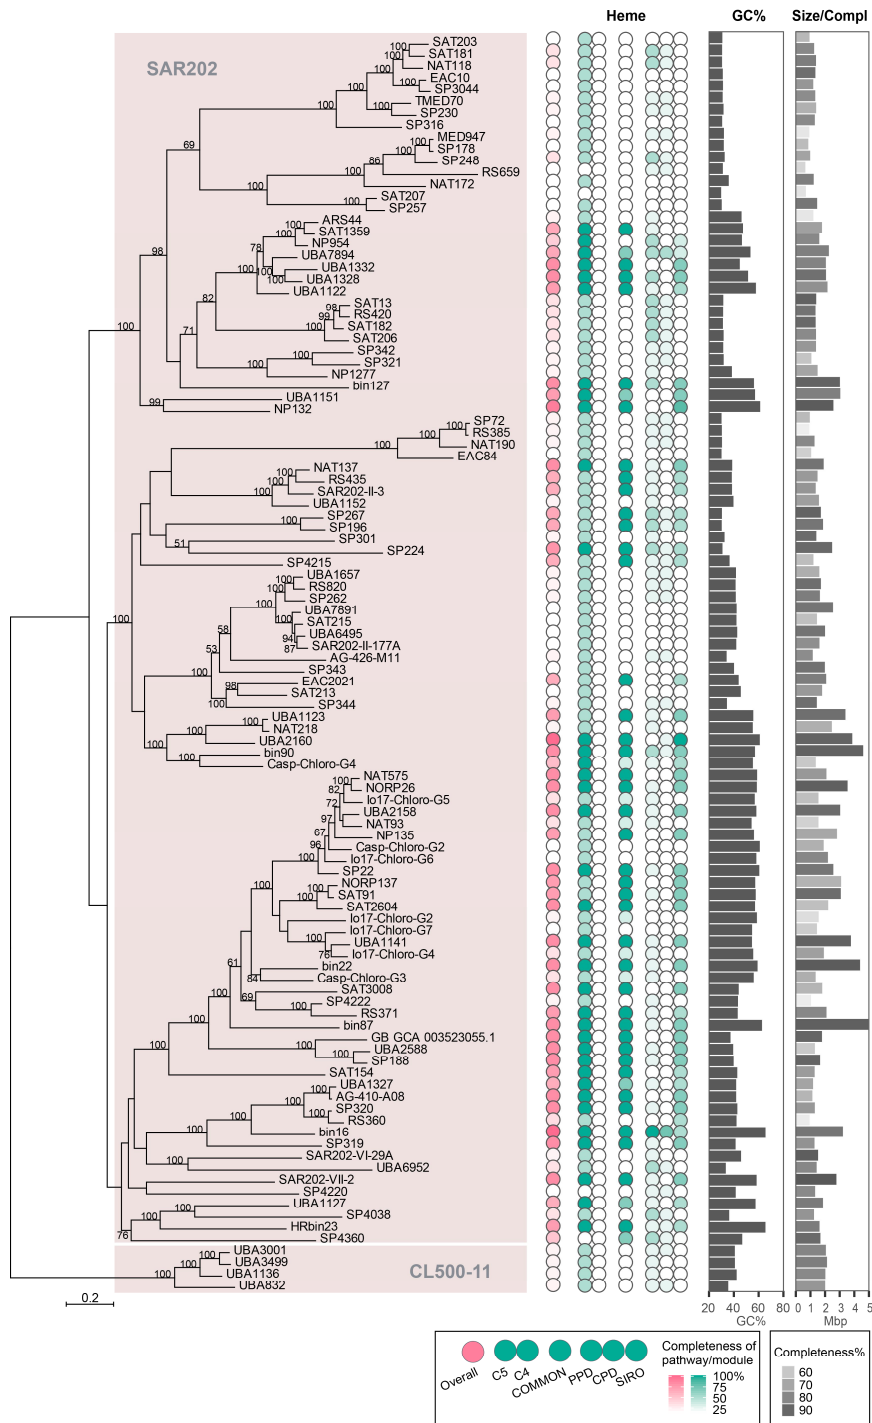

**Fig. S6.** Heme biosynthetic pathway completeness of representative genomes for species clusters belonging to the SAR202 group of *Chloroflexota*. The CL500-11 group was set as an outgroup in the tree on the left. Refer to the Fig. S4 legend for a detailed explanation.

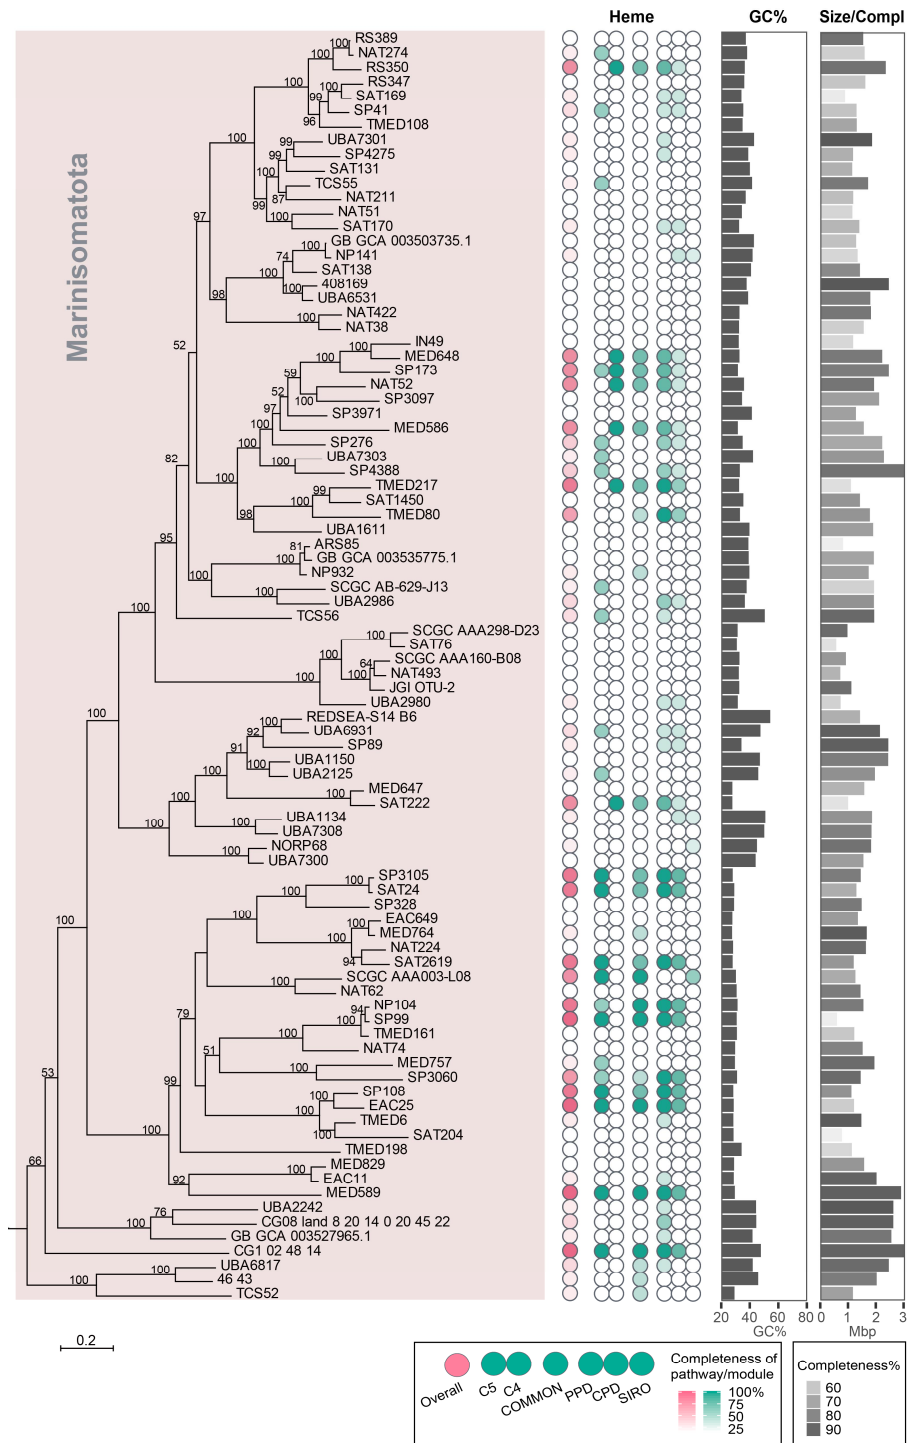

**Fig. S7.** Heme biosynthetic pathway completeness of representative genomes for species clusters belonging to the *Marinisomatota*. *Flavobacterium aquatile* LMG 4008 (RefSeq assembly ID: GCF\_000757385.1) was set as an outgroup in the tree on the left. Refer to the Fig. S4 legend for a detailed explanation.

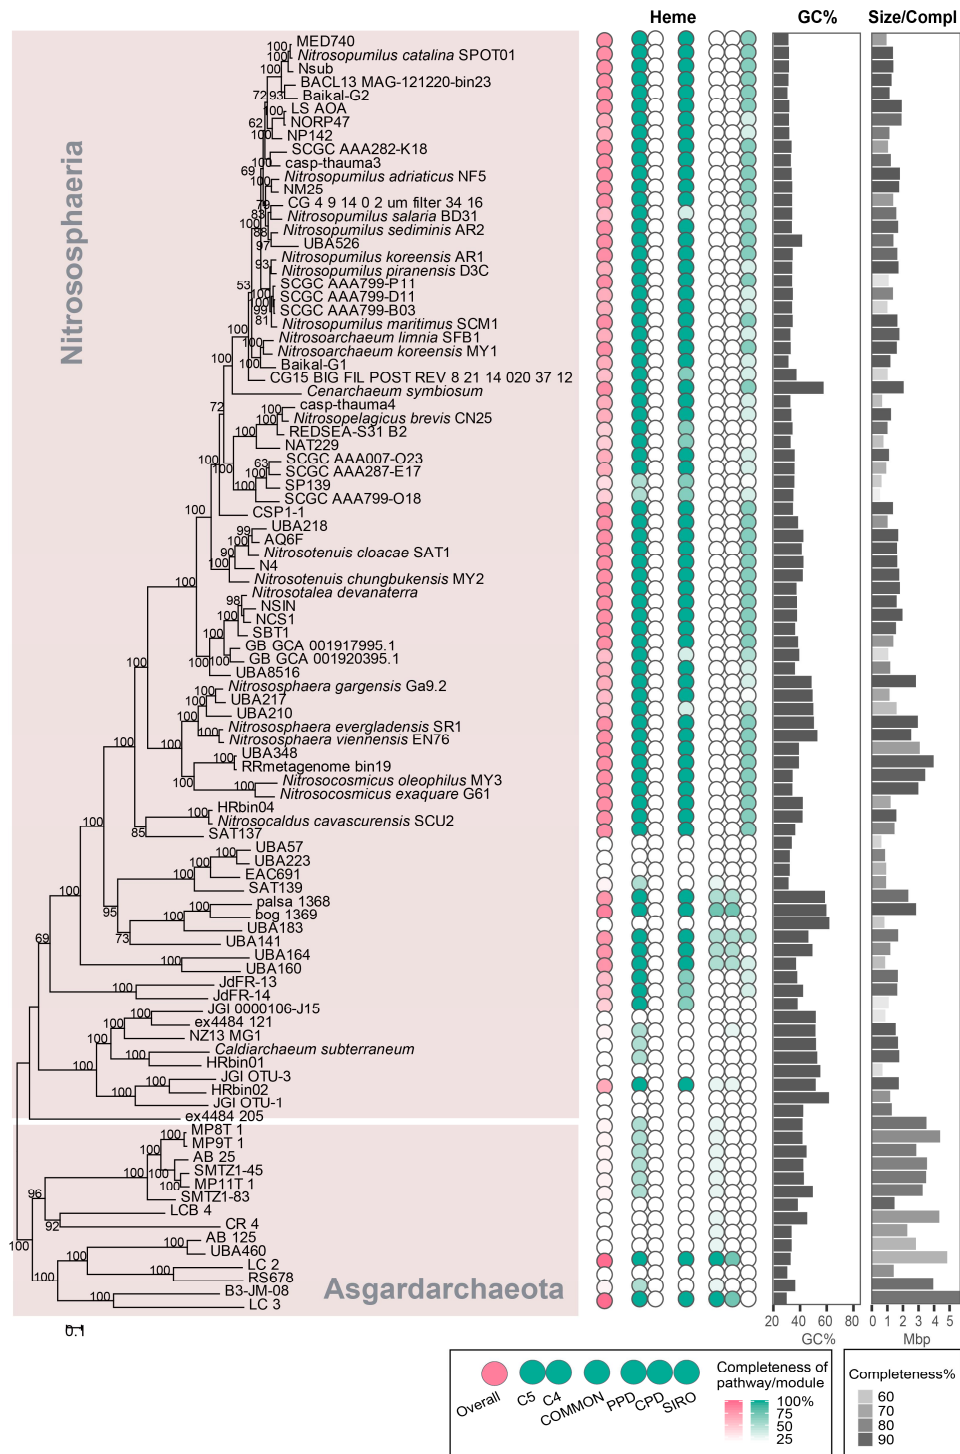

**Fig. S8.** Heme biosynthetic pathway completeness of representative genomes for species clusters belonging to the *Nitrososphaeria* and *Asgardarchaeota*. *Asgardarchaeota* was set as an outgroup in the tree on the left. Refer to the Fig. S4 legend for a detailed explanation.

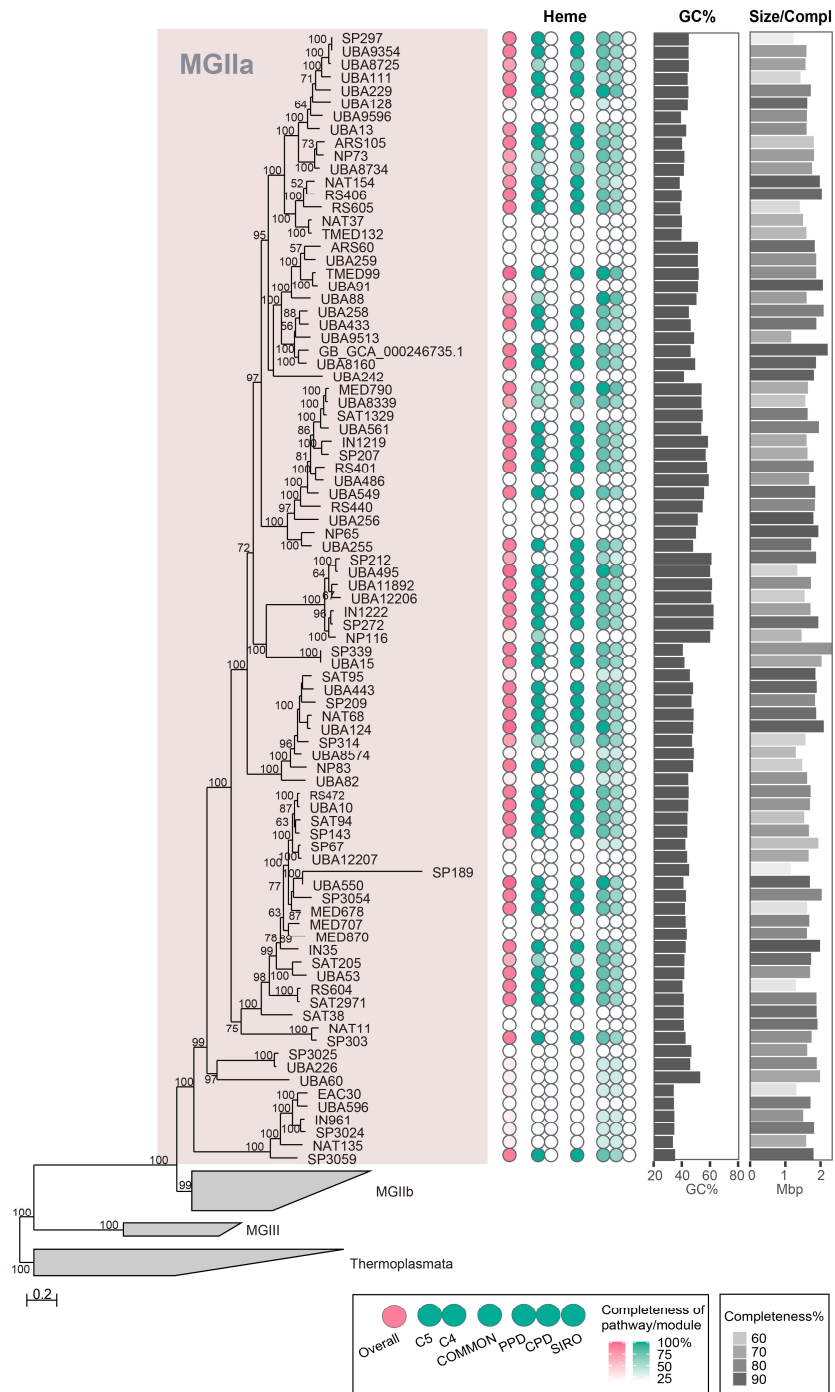

**Fig. S9.** Heme biosynthetic pathway completeness of representative genomes for species clusters belonging to MGIIa of *Archaea*. *Thermoplasmata* was set as an outgroup in the tree on the left. Refer to the Fig. S4 legend for a detailed explanation.

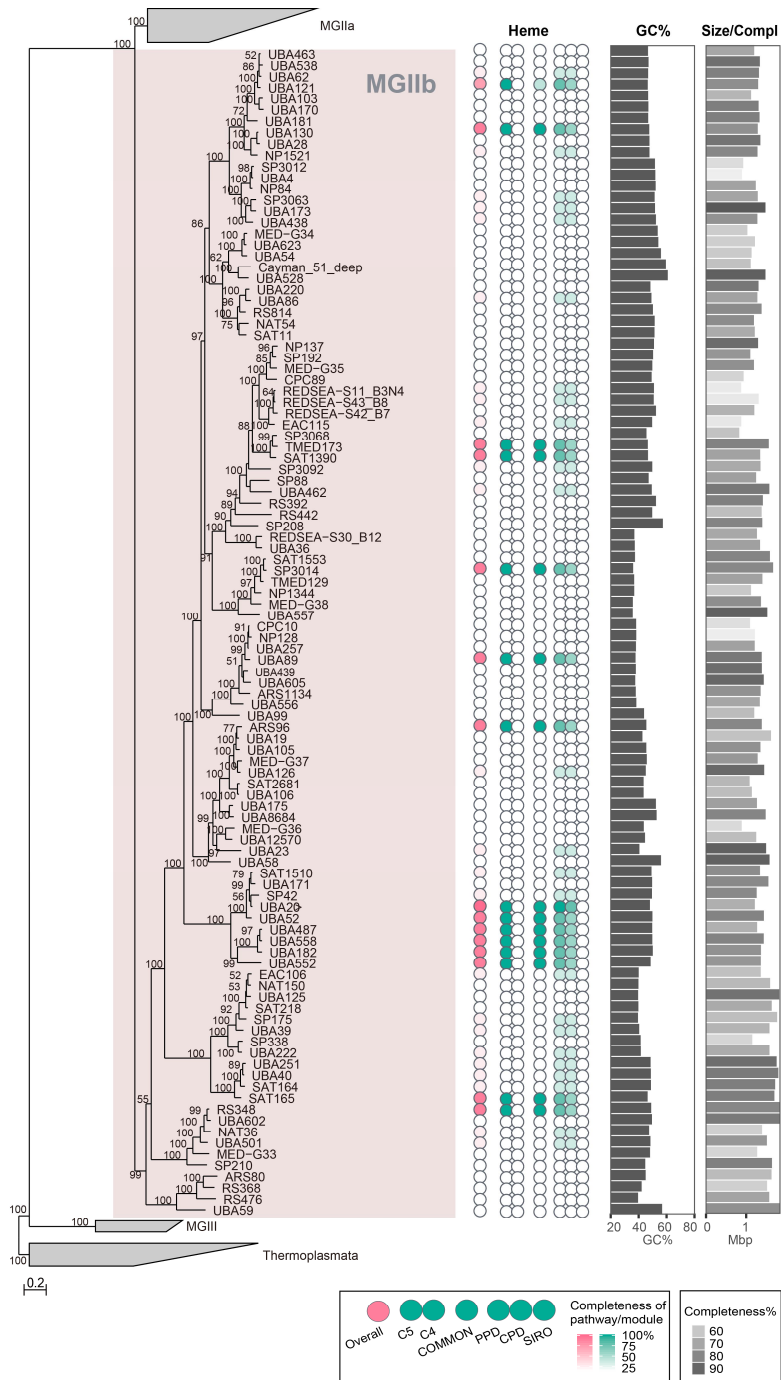

**Fig. S10.** Heme biosynthetic pathway completeness of representative genomes for species clusters belonging to MGIIb of *Archaea*. *Thermoplasmata* was set as an outgroup in the tree on the left. Refer to the Fig. S4 legend for a detailed explanation.



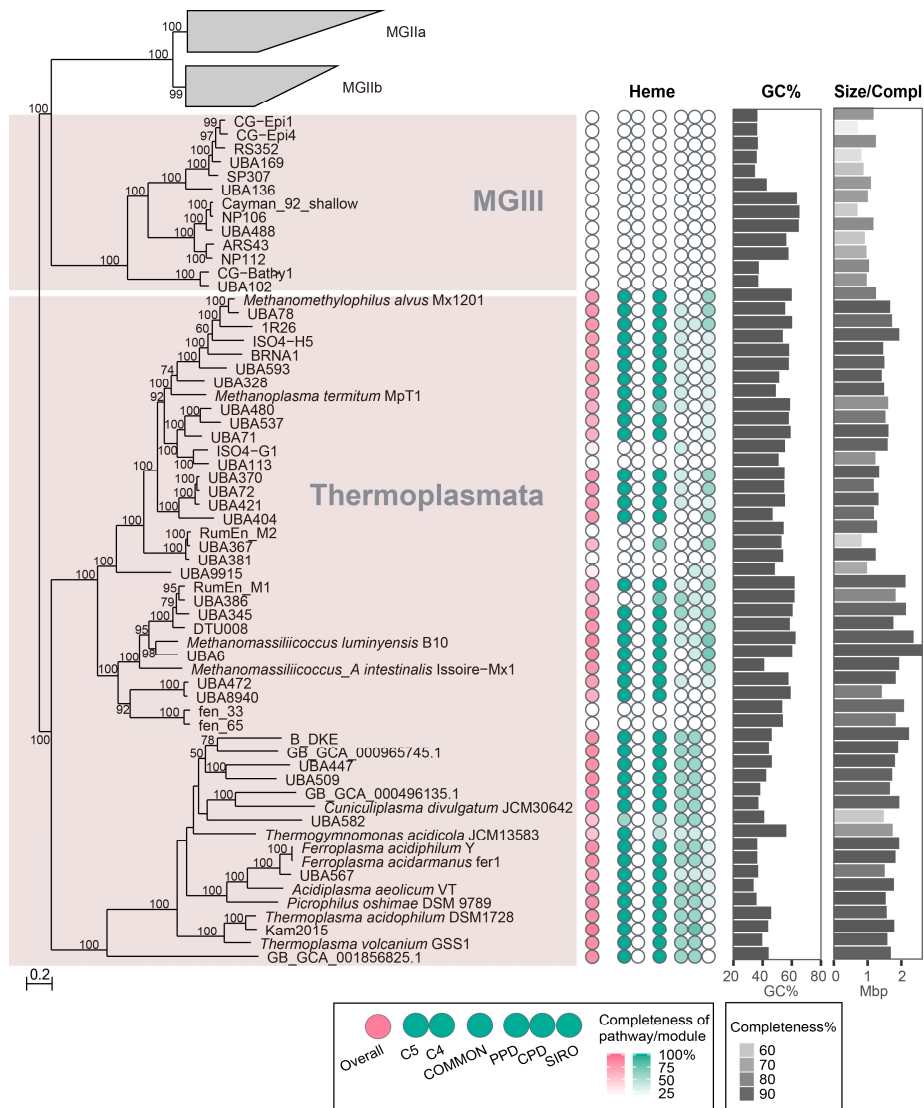

**Fig. S11.** Heme biosynthetic pathway completeness of representative genomes for species clusters belonging to MGIII and *Thermoplasmata* of Archaea. *Thermoplasmata* was set as an outgroup in the tree on the left. Refer to the Fig. S4 legend for a detailed explanation.



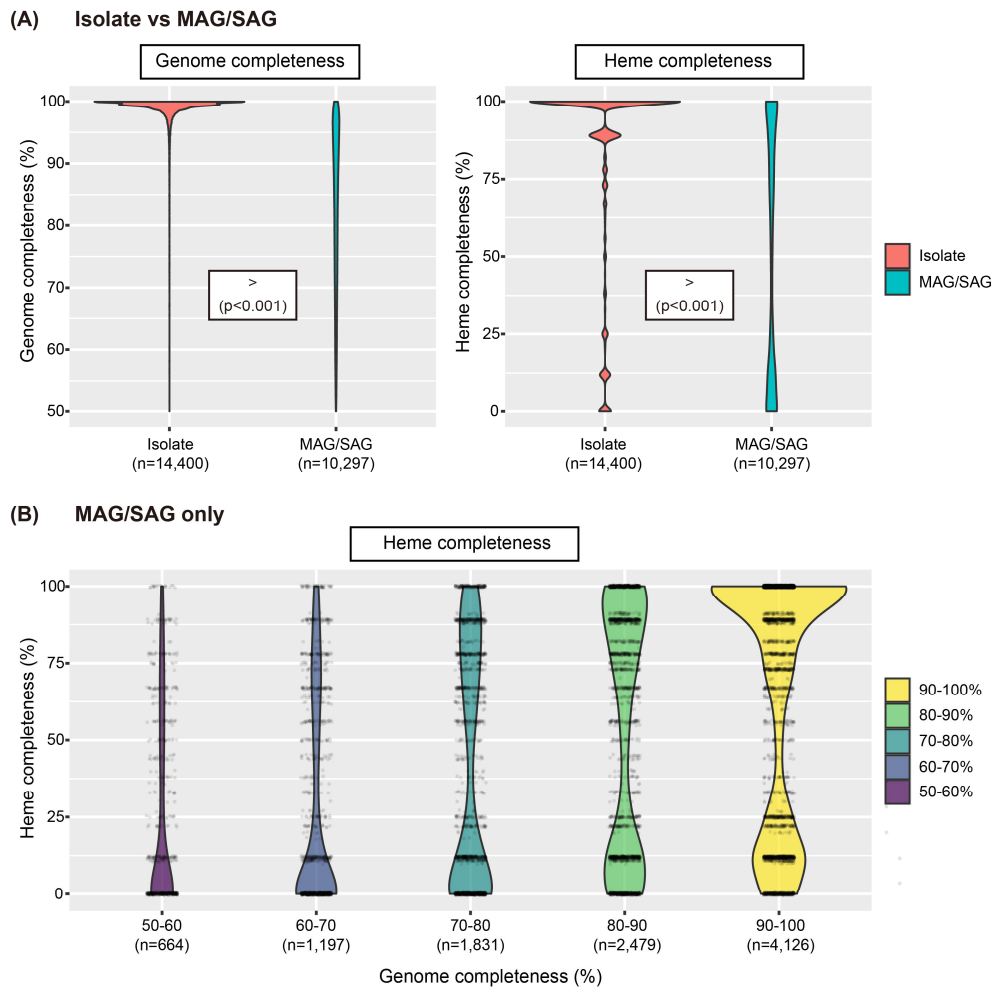

**Fig. S12.** The completeness of genome and heme biosynthetic pathway in the representative genomes for species clusters of GTDB. (A) Distribution of genome and heme completeness among the isolate genomes and MAG/SAGs. Insets show the results of one-sided Mann–Whitney  $U$  test ( $p < 0.001$ ) ( $>$ ) (B) The distribution of heme completeness according to genome completeness among MAG/SAGs. Genomes were divided into five groups according to genome completeness and the distribution of heme completeness in each group was displayed using violin plots. A total of 9 genomes (6 isolates and 3 SAGs) with completeness of  $< 50\%$  were excluded from the analyses for visualization purpose. In all panels, the areas of plots are scaled proportionally to the number of genomes.

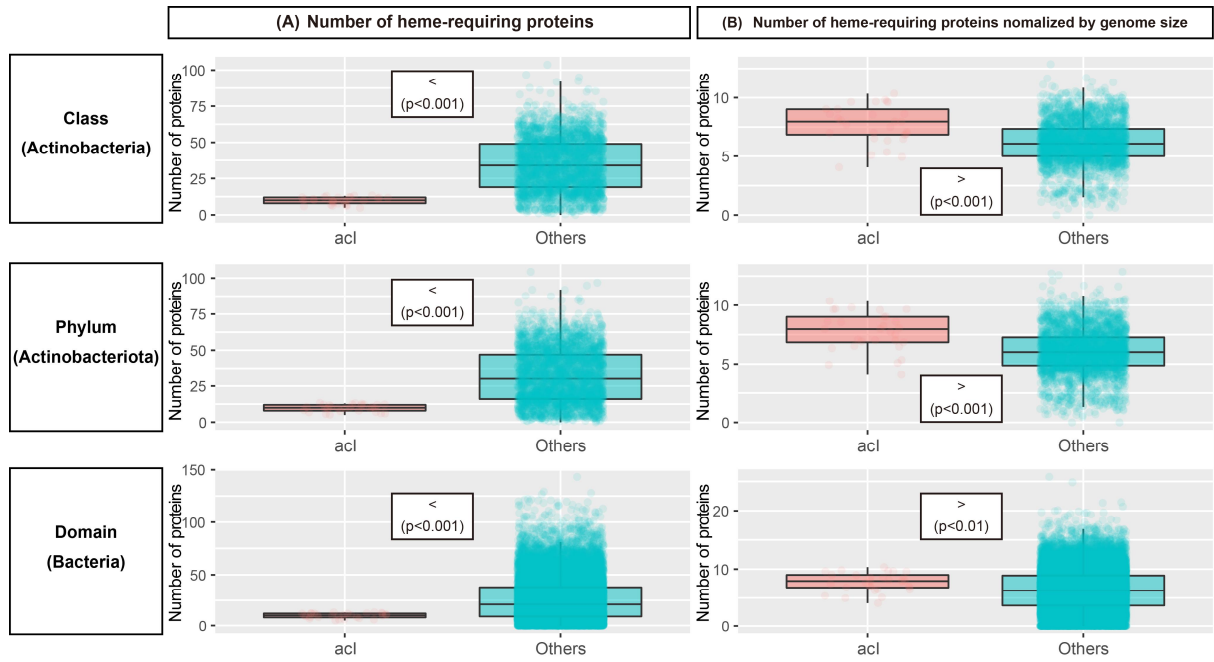

**Fig. S13.** Distribution of the number of heme-requiring proteins in the genomes of the *acl* lineage (*Nanopelagicaceae*) and other members of the same class, phyla, or domain. In the three panels on the left, the number of proteins was not normalized by genome sizes, whereas it was normalized in the three panels on the right. Dots represent the genomes. Insets shows the results of one-sided Mann–Whitney *U* test.

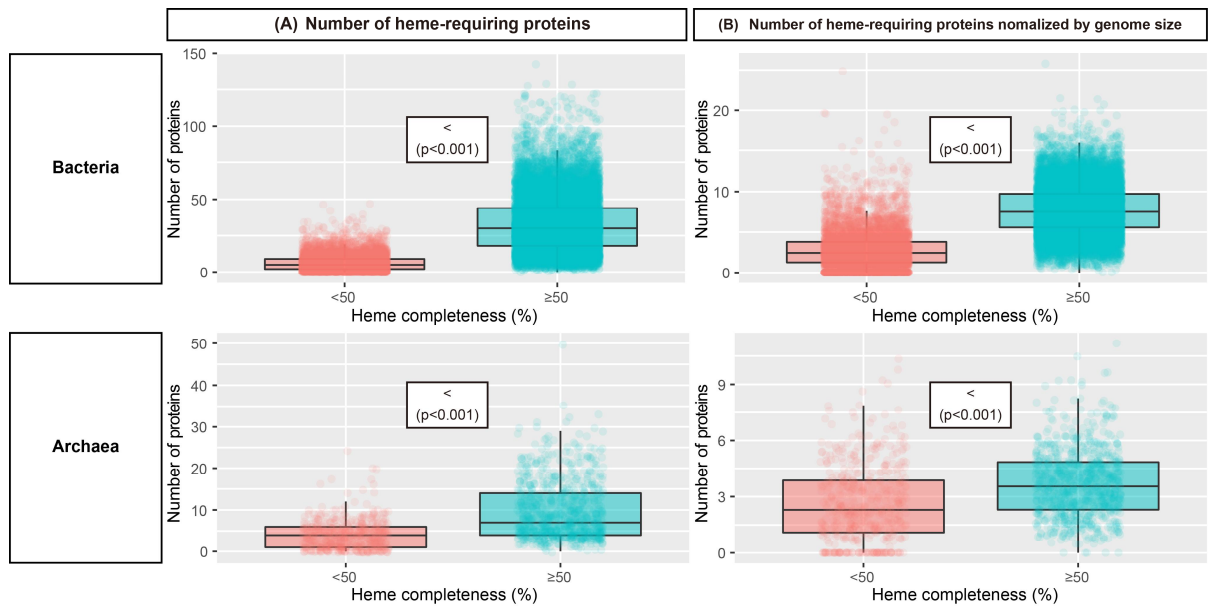

**Fig. S14.** Distribution of the number of heme-requiring proteins in bacterial (upper panels) and archaeal (lower panels) genomes according to the completeness of heme biosynthetic pathway. Bacterial and archaeal genomes were divided into two groups according to heme completeness with a threshold value of 50%, and the distribution of the number of heme-requiring proteins in each group was displayed using boxplots. In the panels on the left, the number of proteins was not normalized by genome sizes, whereas it was normalized in the panels on the right. Dots represent the genomes. Insets show the results of one-sided Mann–Whitney  $U$  test.

**Table S1.** List of enzyme names and corresponding KO IDs for the steps defined in heme biosynthetic pathway presented in Fig. 1

| Step | Enzyme                                                                          | KO (" " → OR)                                       |
|------|---------------------------------------------------------------------------------|-----------------------------------------------------|
| 1    | Glutamyl-tRNA reductase (HemA)                                                  | K02492                                              |
| 2    | Glutamate-1-semialdehyde 2,1-aminomutase (HemL)                                 | K01845                                              |
| 3    | 5-aminolevulinate synthase (AlaS)                                               | K00643                                              |
| 4    | 5-aminolevulinic acid dehydratase (HemB)                                        | K01698                                              |
| 5    | Porphobilinogen deaminase (HemC)                                                | K01749                                              |
| 6    | Uroporphyrinogen III synthase (HemD)                                            | K01719   K13542   K13543                            |
| 7    | Uroporphyrinogen III decarboxylase (HemE)                                       | K01599                                              |
| 8    | Coproporphyrinogen III oxidase (HemF/N)                                         | K00228   K02495                                     |
| 9    | Protoporphyrinogen oxidase (HemG/J/Y)                                           | K00230   K00231   K08973                            |
| 10   | Protoporphyrin ferrochelatase (HemH)                                            | K01772                                              |
| 11   | Protoporphyrinogen oxidase (HemY)                                               | K00231                                              |
| 12   | Ferrochelatase (HemH)                                                           | K01772                                              |
| 13   | Iron-coproporphyrin oxidative decarboxylase (HemQ, AhbD)                        | K00435   K22227                                     |
| 14   | Uroporphyrin-III C-methyltransferase (MET1, CysG, CobA, HemX, CobA-HemD, HemDX) | K00589   K02302   K02303   K02496   K13542   K13543 |
| 15   | Precorrin-2 dehydrogenase (CysG, MET8)                                          | K02302   K02304                                     |
| 16   | Sirohydrochlorin ferrochelatase (CysG, MET8, SirB)                              | K02302   K02304   K03794                            |
| 17   | Siroheme decarboxylase (AhbAB)                                                  | K22225                                              |
| 18   | Fe-coproporphyrin III synthase (AhbC)                                           | K22226                                              |

**Table S2.** Composition of the medium used in this study

| Components                          | Compound(s)                                         | Final concentration |
|-------------------------------------|-----------------------------------------------------|---------------------|
| Ammonium                            | NH <sub>4</sub> Cl                                  | 10 μM               |
| Phosphate                           | KH <sub>2</sub> PO <sub>4</sub>                     | 10 μM               |
| Trace metals                        | FeCl <sub>3</sub> ·6H <sub>2</sub> O                | 117 nM              |
|                                     | MnCl <sub>2</sub> ·4H <sub>2</sub> O                | 9 nM                |
|                                     | ZnSO <sub>4</sub> ·7H <sub>2</sub> O                | 800 pM              |
|                                     | CoCl <sub>2</sub> ·6H <sub>2</sub> O                | 500 pM              |
|                                     | Na <sub>2</sub> MoO <sub>4</sub> ·2H <sub>2</sub> O | 300 pM              |
|                                     | Na <sub>2</sub> SeO <sub>3</sub>                    | 1 nM                |
|                                     | NiCl <sub>2</sub> ·6H <sub>2</sub> O                | 1 nM                |
|                                     | Vitamin mixture                                     | Thiamine·HCl        |
| Niacin                              |                                                     | 81 nM               |
| Ca-Pantothenate                     |                                                     | 84 nM               |
| Pyridoxine                          |                                                     | 59 nM               |
| Biotin                              |                                                     | 409 pM              |
| Folic acid                          |                                                     | 453 pM              |
| Vitamin B12                         |                                                     | 70 pM               |
| Myo-inositol                        |                                                     | 555 nM              |
| <i>p</i> -Aminobenzoic Acid         |                                                     | 7 nM                |
| Carbon mixture                      |                                                     | Pyruvate            |
|                                     | D-Glucose                                           | 5 μM                |
|                                     | <i>N</i> -Acetyl-D-glucosamine                      | 5 μM                |
|                                     | D-Ribose                                            | 5 μM                |
|                                     | Methyl alcohol                                      | 5 μM                |
| 20 proteinogenic amino acid mixture | Each amino acid                                     | 100 nM, each        |

**Table S3.** Distribution of heme uptake systems HemTUV and DppABCDF in 20 complete *aci* genomes

| Tribe | Genome                                                   | HemTUV | DppABCDF   |
|-------|----------------------------------------------------------|--------|------------|
| A1    | ' <i>Candidatus</i> Planktophila rubra' IMCC25003        | HemTUV | DppABCDF   |
| A1    | ' <i>Candidatus</i> Planktophila dulcis' MMS-21-155      |        | DppABCDF   |
| A1    | ' <i>Candidatus</i> Planktophila dulcis' MMS-IA-53       |        | DppABCDF   |
| A1    | ' <i>Candidatus</i> Planktophila dulcis' MMS-IIA-65      |        | DppABCDF   |
| A1    | ' <i>Candidatus</i> Planktophila sulfonica' MMS-IA-56    | HemTUV | DppABCDF   |
| A1    | ' <i>Candidatus</i> Planktophila versatilis' MMS-IA-105  | HemTUV |            |
| A1    | ' <i>Candidatus</i> Planktophila versatilis' MMS-IA-79   | HemTUV |            |
| A1    | ' <i>Candidatus</i> Planktophila versatilis' MMS-IIB-142 | HemTUV |            |
| A1    | ' <i>Candidatus</i> Planktophila versatilis' MMS-IIB-76  | HemTUV |            |
| A2    | ' <i>Candidatus</i> Planktophila limnetica' MMS-VB-114   | HemTUV | 2 DppABCDF |
| A4    | ' <i>Candidatus</i> Planktophila aquatilis' IMCC26103    |        | 2 DppABCDF |
| A4    | ' <i>Candidatus</i> Planktophila lacus' MMS-21-148       | HemTUV | DppABCDF   |
| A4    | ' <i>Candidatus</i> Planktophila lacus' MMS-IIB-106      | HemTUV | DppABCDF   |
| A4    | ' <i>Candidatus</i> Planktophila lacus' MMS-IIB-60       | HemTUV | DppABCDF   |
| A7    | Actinobacteria bacterium IMCC19121                       |        | DppABCDF   |
| A7    | ' <i>Candidatus</i> Planktophila vernalis' MMS-IIA-15    |        | DppABCD    |
| B1    | ' <i>Candidatus</i> Nanopelagicus limnes' MMS-21-122     |        | DppABCDF   |
| B1    | ' <i>Candidatus</i> Nanopelagicus limnes' MMS-21-160     |        | DppABCDF   |
| B1    | ' <i>Candidatus</i> Nanopelagicus limnes' MMS-IIB-91     |        | DppABCDF   |
| C1    | Actinobacteria bacterium IMCC26077                       | HemTUV | DppABCDF   |

**Table S4.** List of the microbial group names used in this study and their GTDB taxonomy

| Group name                | Alternative                                                 | GTDB taxonomy                                                                                             | Reference* |
|---------------------------|-------------------------------------------------------------|-----------------------------------------------------------------------------------------------------------|------------|
| <i>Limnohabitans</i>      |                                                             | d_Bacteria;p_Proteobacteria;c_Gammaproteobacteria;o_Burkholderiales;f_Burkholderiaceae;g_Limnohabitans    | (3)        |
| <i>Polynucleobacter</i>   |                                                             | d_Bacteria;p_Proteobacteria;c_Gammaproteobacteria;o_Burkholderiales;f_Burkholderiaceae;g_Polynucleobacter | (3)        |
| OM43                      |                                                             | d_Bacteria;p_Proteobacteria;c_Gammaproteobacteria;o_Burkholderiales;f_Methylophilaceae;g_BACL14           | (4)        |
| <i>Methylopusillus</i>    | LD28                                                        | d_Bacteria;p_Proteobacteria;c_Gammaproteobacteria;o_Burkholderiales;f_Methylophilaceae;g_Methylopusillus  | (4)        |
| <i>Haliaceae</i>          | OM60/NOR5                                                   | d_Bacteria;p_Proteobacteria;c_Gammaproteobacteria;o_Pseudomonadales;f_Haliaceae                           | (5)        |
| <i>Spongiibacteraceae</i> | BD1-7                                                       | d_Bacteria;p_Proteobacteria;c_Gammaproteobacteria;o_Pseudomonadales;f_Spongiibacteraceae                  | (5)        |
| <i>Porticoccaceae</i>     | SAR92                                                       | d_Bacteria;p_Proteobacteria;c_Gammaproteobacteria;o_Pseudomonadales;f_Porticoccaceae                      | (5)        |
| <i>Alteromonas</i>        |                                                             | d_Bacteria;p_Proteobacteria;c_Gammaproteobacteria;o_Enterobacteriales;f_Alteromonadaceae;g_Alteromonas    | (6, 7)     |
| <i>Thioglobus</i>         | SUP05                                                       | d_Bacteria;p_Proteobacteria;c_Gammaproteobacteria;o_Thiomicrospirales;f_Thioglobaceae;g_Thioglobus        | (8)        |
| SAR86                     |                                                             | d_Bacteria;p_Proteobacteria;c_Gammaproteobacteria;o_SAR86                                                 | (9)        |
| <i>Pelagibacterales</i>   | SAR11, LD12                                                 | d_Bacteria;p_Proteobacteria;c_Alphaproteobacteria;o_Pelagibacterales                                      | (10)       |
| HIMB59                    | AEGEAN-169                                                  | d_Bacteria;p_Proteobacteria;c_Alphaproteobacteria;o_HIMB59                                                | (10)       |
| <i>Puniceispirillales</i> | SAR116                                                      | d_Bacteria;p_Proteobacteria;c_Alphaproteobacteria;o_Puniceispirillales                                    | (9)        |
| <i>Rhodobacteraceae</i>   |                                                             | d_Bacteria;p_Proteobacteria;c_Alphaproteobacteria;o_Rhodobacterales;f_Rhodobacteraceae                    | (6, 7, 11) |
| SAR324                    | Marine group B                                              | d_Bacteria;p_SAR324                                                                                       | (12, 13)   |
| <i>Flavobacteriaceae</i>  |                                                             | d_Bacteria;p_Bacteroidota;c_Bacteroidia;o_Flavobacteriales;f_Flavobacteriaceae                            | (7, 14)    |
| <i>Marinimicrobia</i>     | SAR406, Marine group A                                      | d_Bacteria;p_Marinisomatota                                                                               | (9, 15)    |
| OM1                       |                                                             | d_Bacteria;p_Actinobacteriota;c_Acidimicrobiia;o_TMED189                                                  | (16, 17)   |
| acIV                      |                                                             | d_Bacteria;p_Actinobacteriota;c_Acidimicrobiia;o_Microtrichales;f_Ilumatobacteraceae;g_UBA3006            | (3)        |
|                           |                                                             | d_Bacteria;p_Actinobacteriota;c_Acidimicrobiia;o_Microtrichales;f_Ilumatobacteraceae;g_BACL27             |            |
|                           |                                                             | d_Bacteria;p_Actinobacteriota;c_Acidimicrobiia;o_Microtrichales;f_Ilumatobacteraceae;g_UBA2093            |            |
|                           |                                                             | d_Bacteria;p_Actinobacteriota;c_Acidimicrobiia;o_Microtrichales;f_Ilumatobacteraceae;g_Casp-actino8       |            |
| <i>Rhodoluna</i>          |                                                             | d_Bacteria;p_Actinobacteriota;c_Actinobacteria;o_Actinomycetales;f_Microbacteriaceae;g_Rhodoluna          | (3)        |
| acI                       |                                                             | d_Bacteria;p_Actinobacteriota;c_Actinobacteria;o_Nanopelagiales;f_Nanopelagicaceae                        | (3)        |
| SAR202                    |                                                             | d_Bacteria;p_Chloroflexota;c_Dehalococcoidia;o_UBA1151                                                    | (18)       |
|                           |                                                             | d_Bacteria;p_Chloroflexota;c_Dehalococcoidia;o_SAR202                                                     |            |
|                           |                                                             | d_Bacteria;p_Chloroflexota;c_Dehalococcoidia;o_UBA3495                                                    |            |
|                           |                                                             | d_Bacteria;p_Chloroflexota;c_Dehalococcoidia;o_UBA2985                                                    |            |
|                           |                                                             | d_Bacteria;p_Chloroflexota;c_Dehalococcoidia;o_GCA-2717565                                                |            |
|                           |                                                             | d_Bacteria;p_Chloroflexota;c_Dehalococcoidia;o_UBA2963                                                    |            |
|                           |                                                             | d_Bacteria;p_Chloroflexota;c_Dehalococcoidia;o_UBA6952                                                    |            |
|                           |                                                             | d_Bacteria;p_Chloroflexota;c_Dehalococcoidia;o_UBA1127                                                    |            |
|                           | d_Bacteria;p_Chloroflexota;c_Dehalococcoidia;o_SAR202-VII-2 |                                                                                                           |            |
| CL500-11                  |                                                             | d_Bacteria;p_Chloroflexota;c_Anaerolineae;o_Anaerolineales;f_UBA11657                                     | (19)       |

|                        |                           |   |                                                                               |          |
|------------------------|---------------------------|---|-------------------------------------------------------------------------------|----------|
| <i>Patescibacteria</i> | Candidate phyla radiation | p | Patescibacteria                                                               | (20)     |
| <i>Asgardarchaeota</i> | Asgard archaea            | p | Asgardarchaeota                                                               | (21, 22) |
| Marine Group IIa       |                           | d | Archaea;p Thermoplasmata;c Poseidoniia;o Poseidoniales;f Poseidoniaceae       | (23, 24) |
| Marine Group IIb       |                           | d | Archaea;p Thermoplasmata;c Poseidoniia;o Poseidoniales;f Thalammararchaeaceae | (23, 24) |
| Marine Group III       |                           | d | Archaea;p Thermoplasmata;c Poseidoniia;o MGIII                                | (23, 24) |
| Thaumarchaeota         | Marine Group I            | d | Archaea;p Crenarchaeota;c Nitrososphaeria                                     | (23, 24) |

\* References supporting the widespread distribution of each of the microbial groups listed in this table in aquatic habitats.



**Table S5.** Completeness and contamination of the representative genomes for species clusters of GTDB (R89)

|                      | Contamination (%) | Completeness (%) |       |       |       |       |   |
|----------------------|-------------------|------------------|-------|-------|-------|-------|---|
|                      |                   | ≥90              | 80–90 | 70–80 | 60–70 | 50–60 |   |
| Isolates<br>(14,406) | <5                | 13,911           | 163   | 73    | 35    | 23    | 6 |
|                      | 5–10              | 162              | 4     | 1     | 0     | 0     | 0 |
|                      | ≥10               | 24               | 3     | 1     | 0     | 0     | 0 |
| MAG/SAGs<br>(10,300) | <5                | 3,852            | 2,337 | 1,813 | 1,197 | 661   | 3 |
|                      | 5–10              | 267              | 142   | 18    | 0     | 3     | 0 |
|                      | ≥10               | 7                | 0     | 0     | 0     | 0     | 0 |
| All<br>(24,706)      | <5                | 17,763           | 2,500 | 1,886 | 1,232 | 684   | 9 |
|                      | 5–10              | 429              | 146   | 19    | 0     | 3     | 0 |
|                      | ≥10               | 31               | 3     | 1     | 0     | 0     | 0 |

\* High-quality (completeness ≥90% and contamination <5%) and medium-quality (completeness ≥50% and contamination <10%) genomes are indicated in yellow and green background, respectively.

**Dataset S1 (separate file).** List of genomes analyzed in this study and their features including GTDB ID (GenBank Assembly accession number), GTDB taxonomy, genome characteristics, and heme biosynthetic pathway completeness.

### SI References

1. Haase, I. et al. Enzymes from the haloacid dehalogenase (HAD) superfamily catalyse the elusive dephosphorylation step of riboflavin biosynthesis. *Chembiochem* **14**, 2272-2275 (2013).
2. Sarge, S. et al. Catalysis of an essential step in vitamin B2 biosynthesis by a consortium of broad spectrum hydrolases. *Chembiochem* **16**, 2466-2469 (2015).
3. R. J. Newton, S. E. Jones, A. Eiler, K. D. McMahon & S. Bertilsson. A guide to the natural history of freshwater lake bacteria. *Microbiol. Mol. Biol. Rev.* **75**, 14-49 (2011).
4. M. M. Salcher, D. Schaeffle, M. Kaspar, S. M. Neuenschwander & R. Ghai. Evolution in action: habitat transition from sediment to the pelagial leads to genome streamlining in *Methylophilaceae*. *ISME J.* **13**, 2764-2777 (2019).
5. S. Spring, C. Scheuner, M. Goker & H. P. Klenk. A taxonomic framework for emerging groups of ecologically important marine gammaproteobacteria based on the reconstruction of evolutionary relationships using genome-scale data. *Front. Microbiol.* **6**, 281 (2015).

6. S. J. Giovannoni, J. C. Thrash & B. Temperton. Implications of streamlining theory for microbial ecology. *ISME J.* **8**, 1553-1565 (2014).
7. A. Buchan, G. R. LeClerc, C. A. Gulvik & J. M. Gonzalez. Master recyclers: features and functions of bacteria associated with phytoplankton blooms. *Nat. Rev. Microbiol.* **12**, 686-698 (2014).
8. V. Shah, B. X. Chang & R. M. Morris. Cultivation of a chemoautotroph from the SUP05 clade of marine bacteria that produces nitrite and consumes ammonium. *ISME J.* **11**, 263-271 (2017).
9. B. K. Swan et al. Prevalent genome streamlining and latitudinal divergence of planktonic bacteria in the surface ocean. *Proc. Natl. Acad. Sci. USA* **110**, 11463-11468 (2013).
10. J. Grote et al. Streamlining and core genome conservation among highly divergent members of the SAR11 clade. *mBio* **3**, e00252-12 (2012).
11. M. Simon et al. Phylogenomics of *Rhodobacteraceae* reveals evolutionary adaptation to marine and non-marine habitats. *ISME J.* **11**, 1483-1499 (2017).
12. C. S. Sheik, S. Jain & G. J. Dick. Metabolic flexibility of enigmatic SAR324 revealed through metagenomics and metatranscriptomics. *Environ. Microbiol.* **16**, 304-317 (2014).
13. B. K. Swan et al. Potential for chemolithoautotrophy among ubiquitous bacteria lineages in the dark ocean. *Science* **333**, 1296-1300 (2011).
14. H. Zhang et al. Repeated evolutionary transitions of *Flavobacteria* from marine to non-marine habitats. *Environ. Microbiol.* **21**, 648-666 (2019).
15. E. W. Getz, S. S. Tithi, L. Q. Zhang & F. O. Aylward. Parallel evolution of genome streamlining and cellular bioenergetics across the marine radiation of a bacterial phylum. *mBio* **9**, e01089-18 (2018).
16. R. M. Morris et al. Temporal and spatial response of bacterioplankton lineages to annual convective overturn at the Bermuda Atlantic time-series study site. *Limnol. Oceanogr.* **50**, 1687-1696 (2005).
17. C. M. Mizuno, F. Rodriguez-Valera & R. Ghai. Genomes of planktonic *Acidimicrobiales*: widening horizons for marine *Actinobacteria* by metagenomics. *mBio* **6**, e02083-14 (2015).
18. J. H. W. Saw et al. Pangenomics analysis reveals diversification of enzyme families and niche specialization in globally abundant SAR202 bacteria. *mBio* **11**, e02975-19 (2020).
19. Y. Okazaki, M. M. Saicher, C. Callieri & S. Nakano. The broad habitat spectrum of the CL500-11 lineage (phylum *Chloroflexi*), a dominant bacterioplankton in oxygenated hypolimnia of deep freshwater lakes. *Front. Microbiol.* **9**, 2891 (2018).

20. C. T. Brown et al. Unusual biology across a group comprising more than 15% of domain *Bacteria*. *Nature* **523**, 208-U173 (2015).
21. Y. Liu et al. Expanded diversity of Asgard archaea and their relationships with eukaryotes. *Nature* <https://doi.org/10.1038/s41586-021-03494-3> (2021).
22. F. MacLeod, G. S. Kindler, H. L. Wong, R. Chen & B. P. Burns. Asgard archaea: diversity, function, and evolutionary implications in a range of microbiomes. *AIMS Microbiol.* **5**, 48-61 (2019).
23. P. S. Adam, G. Borrel, C. Brochier-Armanet & S. Gribaldo. The growing tree of Archaea: new perspectives on their diversity, evolution and ecology. *ISME J.* **11**, 2407-2425 (2017).
24. R. Massana, E. F. DeLong & C. Pedros-Alio. A few cosmopolitan phylotypes dominate planktonic archaeal assemblages in widely different oceanic provinces. *Appl. Environ. Microbiol.* **66**, 1777-1787 (2000).
